# Supplementary material for: Chiral spin-crossover complexes based on an enantiopure Schiff base ligand with three chiral carbon centers
Source: PubMed Central journal article supplement — Dalton Trans. 2024 Jun 3;53(25):10637–43. doi: 10.1039/d4dt00924j (PMC11197010; doi:10.1039/d4dt00924j), 2024-06-03
Supplement: DT-053-D4DT00924J-s001.pdf [file DT-053-D4DT00924J-s001.pdf]

ESI for

## Chiral Spin-crossover complexes based on an enantiopure Schiff base ligand with three chiral carbon centers

Alejandro Regueiro,<sup>a</sup> Víctor García-López,<sup>a</sup> Alicia Forment-Aliaga<sup>a</sup> and Miguel Clemente-León <sup>\*a</sup>

**Fig. S1** Experimental (red line) and simulated (blue line) powder X-ray diffraction patterns of [Fe(*RR-S-L*<sub>2</sub>)(NCSe)<sub>2</sub>] (a), [Fe(*SS-R-L*<sub>2</sub>)(NCSe)<sub>2</sub>] (b), [Fe(*RR-S-L*<sub>2</sub>)(NCS)<sub>2</sub>] (c) and [Fe(*SS-R-L*<sub>2</sub>)(NCSe)<sub>2</sub>] (d).

**Fig. S2** TGA of [Fe(*RR-S-L*<sub>2</sub>)(NCSe)<sub>2</sub>] (black line), [Fe(*SS-R-L*<sub>2</sub>)(NCSe)<sub>2</sub>] (red line), [Fe(*RR-S-L*<sub>2</sub>)(NCS)<sub>2</sub>] (blue line) and [Fe(*SS-R-L*<sub>2</sub>)(NCSe)<sub>2</sub>] (green line).

**Table S1** Crystal data and structure refinement for [Fe(*RR-S-L*<sub>2</sub>)(NCSe)<sub>2</sub>].

**Table S2** Crystal data and structure refinement for [Fe(*SS-R-L*<sub>2</sub>)(NCSe)<sub>2</sub>].

**Table S3** Crystal data and structure refinement for refinement for [Fe(*RR-S-L*<sub>2</sub>)(NCS)<sub>2</sub>].

**Table S4** Crystal data and structure refinement for refinement for [Fe(*SS-R-L*<sub>2</sub>)(NCS)<sub>2</sub>].

**Fig. S3** Asymmetric unit of [Fe(*RR-S-L*<sub>2</sub>)(NCSe)<sub>2</sub>] (left) and [Fe(*SS-R-L*<sub>2</sub>)(NCSe)<sub>2</sub>] (right) at 120 K (top), 300 K (medium) and 400 K (bottom). Fe (brown), Se (orange), C (black), N (blue) and O (red). Hydrogen atoms have been omitted for clarity.

**Fig. S4** Asymmetric unit of [Fe(*RR-S-L*<sub>2</sub>)(NCSe)<sub>2</sub>] (left) and [Fe(*SS-R-L*<sub>2</sub>)(NCSe)<sub>2</sub>] (right) at 90 K (top), 150 K (*RR-S-*) and 130 K (*SS-R-*) (medium) and 200 K (bottom). Fe (brown), S (yellow), C (black), N (blue) and O (red). Hydrogen atoms have been omitted for clarity.

**Fig. S5** Thermal variation of the average Fe-N distances for [Fe(*RR-S-L*<sub>2</sub>)(NCS)<sub>2</sub>] (green circles) and [Fe(*SS-R-L*<sub>2</sub>)(NCS)<sub>2</sub>] (red circles) (**a**) and [Fe(*RR-S-L*<sub>2</sub>)(NCSe)<sub>2</sub>] (green circles) and [Fe(*SS-R-L*<sub>2</sub>)(NCSe)<sub>2</sub>] (red circles) (**b**). Thermal variation of unit cell volumes for [Fe(*RR-S-L*<sub>2</sub>)(NCS)<sub>2</sub>] (green circles) and [Fe(*SS-R-L*<sub>2</sub>)(NCS)<sub>2</sub>] (red circles) (**c**) and [Fe(*RR-S-L*<sub>2</sub>)(NCSe)<sub>2</sub>] (green circles) and [Fe(*SS-R-L*<sub>2</sub>)(NCSe)<sub>2</sub>] (red circles) (**d**).

**Table S5** Bond lengths and distortion parameters of [Fe(*RR-S-* and *SS-R-L*<sub>2</sub>)(NCX)<sub>2</sub>] at variable temperatures. Dashed values correspond to the second configuration of the complexes found in some of the structures.

**Fig. S6** Chains of complexes in the structure of [Fe(*RR-S-L*<sub>2</sub>)(NCSe)<sub>2</sub>] (top) and [Fe(*SS-R-L*<sub>2</sub>)(NCSe)<sub>2</sub>] (bottom) at 120 K linked through intermolecular interactions (red dashed lines).

**Fig. S7** UV-vis spectra and High Tension (HT) Voltage of CD measurements for 1 mM CHCl<sub>3</sub> solutions of [Fe(*RR-S-L*<sub>2</sub>)(NCSe)<sub>2</sub>] and [Fe(*SS-R-L*<sub>2</sub>)(NCSe)<sub>2</sub>] (left) and [Fe(*RR-S-L*<sub>2</sub>)(NCS)<sub>2</sub>] and [Fe(*SS-R-L*<sub>2</sub>)(NCS)<sub>2</sub>] (right).

**Fig. S8** Images of CHCl<sub>3</sub> and MeCN solutions of [Fe(*RR-S-* or *SS-R-L*<sub>2</sub>)(NCX)<sub>2</sub>].

**Fig. S9** Absorbance spectra of [Fe(*RR-S-* or *SS-R-L*<sub>2</sub>)(NCX)<sub>2</sub>] in the solid state.

**Fig. S10** Time variation of  $\gamma_{MT}$  for [Fe(*RR-S-L*<sub>2</sub>)(NCSe)<sub>2</sub>] (green circles) and [Fe(*SS-R-L*<sub>2</sub>)(NCSe)<sub>2</sub>] (red circles) (**top**), [Fe(*RR-S-L*<sub>2</sub>)(NCS)<sub>2</sub>] (green circles) and [Fe(*SS-R-L*<sub>2</sub>)(NCS)<sub>2</sub>] (red circles) (**bottom**) after irradiation at 10 K with 808 nm in the LIESST experiments from **Fig. 5**. [Fe(*RR-S-L*<sub>2</sub>)(NCSe)<sub>2</sub>] and [Fe(*SS-R-L*<sub>2</sub>)(NCS)<sub>2</sub>] were first irradiated with 660 nm (3.4 h for [Fe(*RR-S-L*<sub>2</sub>)(NCSe)<sub>2</sub>] and 0.5 h for [Fe(*SS-R-L*<sub>2</sub>)(NCS)<sub>2</sub>]).

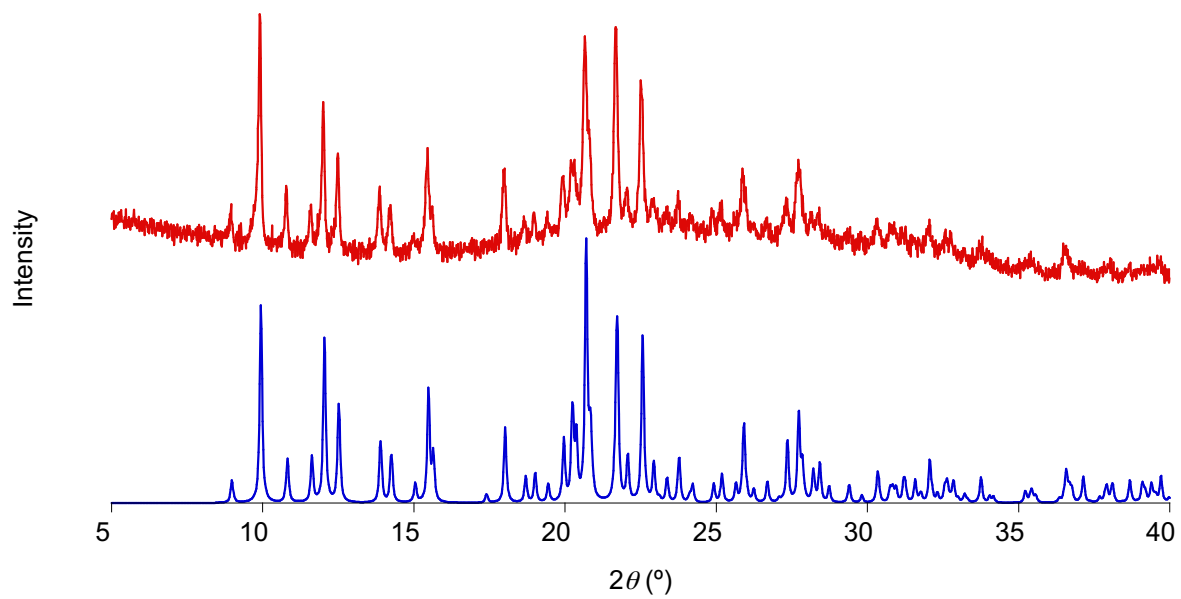

(a)

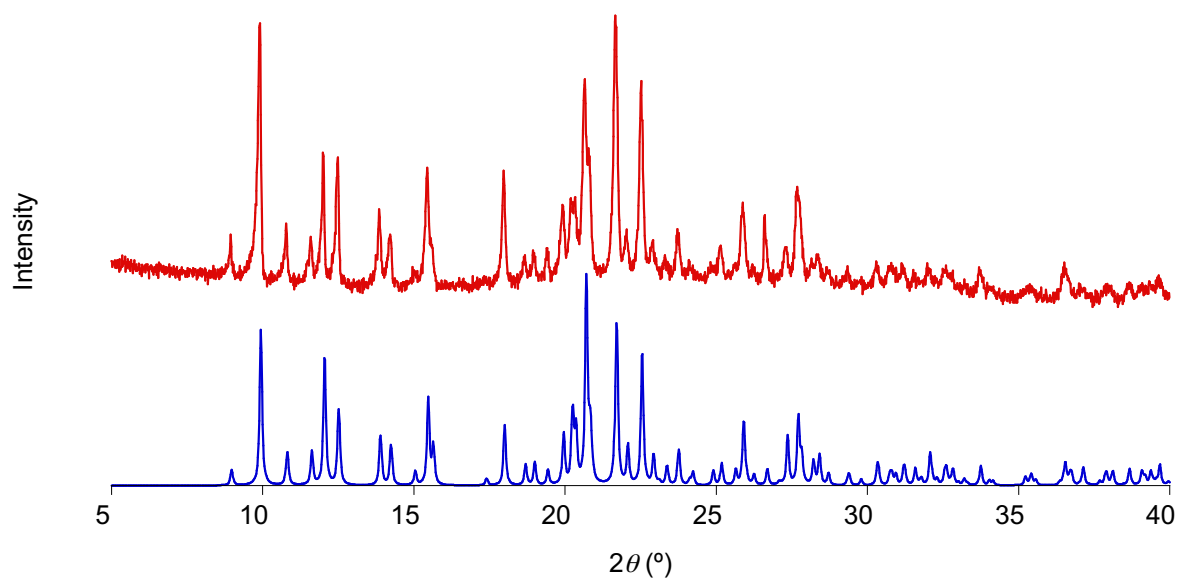

(b)

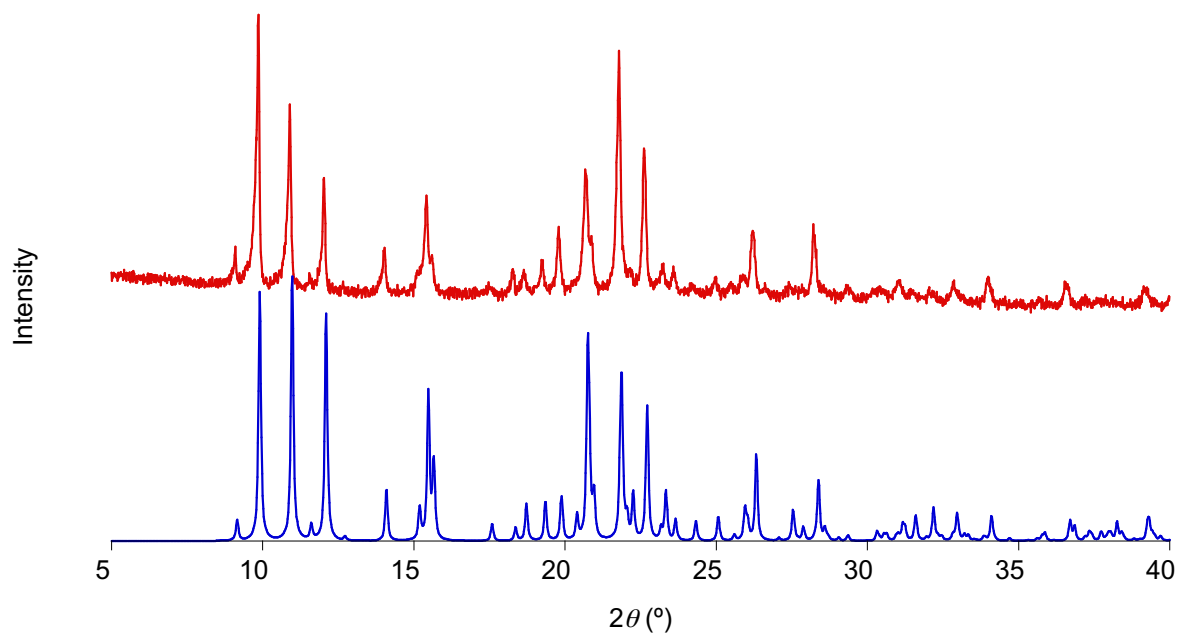

(c)

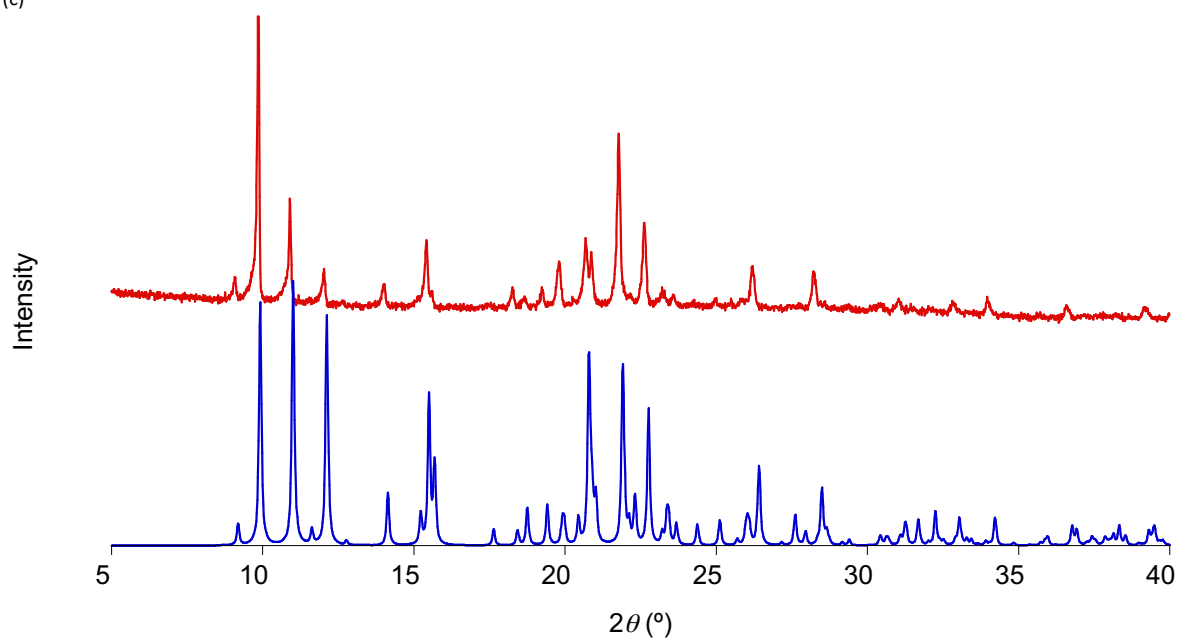

(d)

**Fig. S1** Experimental (red line) and simulated (blue line) powder X-ray diffraction patterns of  $[\text{Fe}(\text{RR-S-L}_2)(\text{NCSe})_2]$  (a),  $[\text{Fe}(\text{SS-R-L}_2)(\text{NCSe})_2]$  (b),  $[\text{Fe}(\text{RR-S-L}_2)(\text{NCS})_2]$  (c) and  $[\text{Fe}(\text{SS-R-L}_2)(\text{NCS})_2]$  (d).

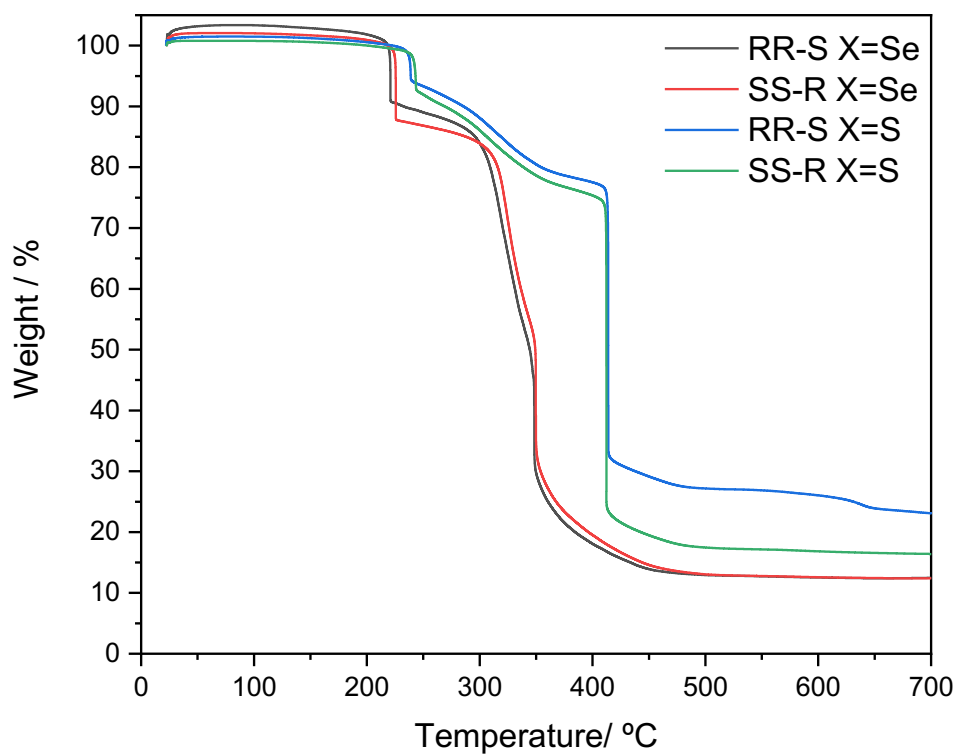

**Fig. S2** TGA of  $[\text{Fe}(\text{RR-S-L}_2)(\text{NCSe})_2]$  (black line),  $[\text{Fe}(\text{SS-R-L}_2)(\text{NCSe})_2]$  (red line),  $[\text{Fe}(\text{RR-S-L}_2)(\text{NCS})_2]$  (blue line) and  $[\text{Fe}(\text{SS-R-L}_2)(\text{NCS})_2]$  (green line).

**Table S1 Crystal data and structure refinement for [Fe(RR-S-L<sub>2</sub>)(NCSe)<sub>2</sub>].**

|                                             |                                                                   |                                                                   |                                                                   |                                                                   |                                                                   |
|---------------------------------------------|-------------------------------------------------------------------|-------------------------------------------------------------------|-------------------------------------------------------------------|-------------------------------------------------------------------|-------------------------------------------------------------------|
| Empirical formula                           | C <sub>23</sub> H <sub>26</sub> FeN <sub>6</sub> OSe <sub>2</sub> | C <sub>23</sub> H <sub>26</sub> FeN <sub>6</sub> OSe <sub>2</sub> | C <sub>23</sub> H <sub>26</sub> FeN <sub>6</sub> OSe <sub>2</sub> | C <sub>23</sub> H <sub>26</sub> FeN <sub>6</sub> OSe <sub>2</sub> | C <sub>23</sub> H <sub>26</sub> FeN <sub>6</sub> OSe <sub>2</sub> |
| Formula weight                              | 616.27                                                            | 616.27                                                            | 616.27                                                            | 616.27                                                            | 616.27                                                            |
| Temperature/K                               | 119.90(14)                                                        | 159.90(14)                                                        | 199.95(10)                                                        | 299.95(10)                                                        | 400.00(10)                                                        |
| Crystal system                              | monoclinic                                                        | monoclinic                                                        | monoclinic                                                        | monoclinic                                                        | monoclinic                                                        |
| Space group                                 | P2 <sub>1</sub>                                                   |
| a/Å                                         | 8.7881(4)                                                         | 8.8057(4)                                                         | 8.8390(6)                                                         | 8.9654(5)                                                         | 9.0291(6)                                                         |
| b/Å                                         | 14.4060(5)                                                        | 14.4435(5)                                                        | 14.5072(8)                                                        | 14.6855(7)                                                        | 14.7931(10)                                                       |
| c/Å                                         | 9.8793(4)                                                         | 9.8922(5)                                                         | 9.9010(7)                                                         | 9.9205(6)                                                         | 9.9962(7)                                                         |
| α/°                                         | 90                                                                | 90                                                                | 90                                                                | 90                                                                | 90                                                                |
| β/°                                         | 98.194(4)                                                         | 98.118(5)                                                         | 98.031(6)                                                         | 97.425(5)                                                         | 97.426(7)                                                         |
| γ/°                                         | 90                                                                | 90                                                                | 90                                                                | 90                                                                | 90                                                                |
| Volume/Å <sup>3</sup>                       | 1237.96(9)                                                        | 1245.53(10)                                                       | 1257.15(14)                                                       | 1295.19(12)                                                       | 1323.98(16)                                                       |
| Z                                           | 2                                                                 | 2                                                                 | 2                                                                 | 2                                                                 | 2                                                                 |
| ρ <sub>calc</sub> /cm <sup>3</sup>          | 1.653                                                             | 1.643                                                             | 1.628                                                             | 1.580                                                             | 1.546                                                             |
| μ/mm <sup>-1</sup>                          | 3.577                                                             | 3.555                                                             | 3.522                                                             | 3.419                                                             | 3.345                                                             |
| F(000)                                      | 616.0                                                             | 616.0                                                             | 616.0                                                             | 616.0                                                             | 616.0                                                             |
| Crystal size/mm <sup>3</sup>                | 0.19 × 0.1 × 0.1                                                  | 0.19 × 0.1 × 0.1                                                  | 0.19 × 0.1 × 0.1                                                  | 0.19 × 0.1 × 0.1                                                  | 0.19 × 0.1 × 0.1                                                  |
| Radiation                                   | MoKα (λ = 0.71073)                                                |
| 2θ range for data collection/°              | 5.656 to 60.922                                                   | 5.642 to 48.92                                                    | 5.616 to 61.136                                                   | 5.548 to 61.062                                                   | 5.724 to 61.23                                                    |
| Index ranges                                | -12 ≤ h ≤ 11, -20 ≤ k ≤ 19, -13 ≤ l ≤ 13                          | -8 ≤ h ≤ 10, -15 ≤ k ≤ 14, -10 ≤ l ≤ 9                            | -12 ≤ h ≤ 12, -20 ≤ k ≤ 20, -14 ≤ l ≤ 13                          | -12 ≤ h ≤ 12, -20 ≤ k ≤ 20, -13 ≤ l ≤ 14                          | -12 ≤ h ≤ 12, -20 ≤ k ≤ 20, -14 ≤ l ≤ 14                          |
| Reflections collected                       | 11745                                                             | 5620                                                              | 21103                                                             | 21667                                                             | 22116                                                             |
| Independent reflections                     | 6663 [R <sub>int</sub> = 0.0443, R <sub>sigma</sub> = 0.0965]     | 2934 [R <sub>int</sub> = 0.0480, R <sub>sigma</sub> = 0.0891]     | 6964 [R <sub>int</sub> = 0.0613, R <sub>sigma</sub> = 0.0890]     | 7197 [R <sub>int</sub> = 0.0709, R <sub>sigma</sub> = 0.1114]     | 7367 [R <sub>int</sub> = 0.1142, R <sub>sigma</sub> = 0.1731]     |
| Data/restraints/parameters                  | 6663/1/299                                                        | 2934/1/299                                                        | 6964/1/299                                                        | 7197/9/312                                                        | 7367/1/299                                                        |
| Goodness-of-fit on F <sup>2</sup>           | 0.994                                                             | 1.023                                                             | 1.001                                                             | 0.966                                                             | 0.943                                                             |
| Final R indexes [I >= 2σ (I)]               | R <sub>1</sub> = 0.0566, wR <sub>2</sub> = 0.0932                 | R <sub>1</sub> = 0.0494, wR <sub>2</sub> = 0.0776                 | R <sub>1</sub> = 0.0550, wR <sub>2</sub> = 0.0922                 | R <sub>1</sub> = 0.0595, wR <sub>2</sub> = 0.0982                 | R <sub>1</sub> = 0.0675, wR <sub>2</sub> = 0.1219                 |
| Final R indexes [all data]                  | R <sub>1</sub> = 0.0893, wR <sub>2</sub> = 0.1067                 | R <sub>1</sub> = 0.0725, wR <sub>2</sub> = 0.0880                 | R <sub>1</sub> = 0.1119, wR <sub>2</sub> = 0.1108                 | R <sub>1</sub> = 0.1777, wR <sub>2</sub> = 0.1339                 | R <sub>1</sub> = 0.2473, wR <sub>2</sub> = 0.1869                 |
| Largest diff. peak/hole / e Å <sup>-3</sup> | 0.99/-0.59                                                        | 0.49/-0.36                                                        | 0.64/-0.37                                                        | 0.45/-0.36                                                        | 0.36/-0.33                                                        |
| Flack parameter                             | 0.005(9)                                                          | -0.007(16)                                                        | 0.016(8)                                                          | 0.016(9)                                                          | -0.020(18)                                                        |

**Table S2 Crystal data and structure refinement for [Fe(SS-R-L<sub>2</sub>)(NCSe)<sub>2</sub>].**

|                                             |                                                                   |                                                                   |                                                                   |                                                                   |
|---------------------------------------------|-------------------------------------------------------------------|-------------------------------------------------------------------|-------------------------------------------------------------------|-------------------------------------------------------------------|
| Empirical formula                           | C <sub>23</sub> H <sub>26</sub> FeN <sub>6</sub> OSe <sub>2</sub> | C <sub>23</sub> H <sub>25</sub> FeN <sub>6</sub> OSe <sub>2</sub> | C <sub>23</sub> H <sub>26</sub> FeN <sub>6</sub> OSe <sub>2</sub> | C <sub>23</sub> H <sub>26</sub> FeN <sub>6</sub> OSe <sub>2</sub> |
| Formula weight                              | 616.27                                                            | 615.26                                                            | 616.27                                                            | 616.27                                                            |
| Temperature/K                               | 120.00(10)                                                        | 300.00(10)                                                        | 340.00(14)                                                        | 400.6(8)                                                          |
| Crystal system                              | monoclinic                                                        | monoclinic                                                        | monoclinic                                                        | monoclinic                                                        |
| Space group                                 | P2 <sub>1</sub>                                                   | P2 <sub>1</sub>                                                   | P2 <sub>1</sub>                                                   | P2 <sub>1</sub>                                                   |
| a/Å                                         | 8.7851(6)                                                         | 8.9670(5)                                                         | 9.0034(12)                                                        | 9.0416(18)                                                        |
| b/Å                                         | 14.3976(10)                                                       | 14.6787(8)                                                        | 14.735(3)                                                         | 14.803(3)                                                         |
| c/Å                                         | 9.8896(6)                                                         | 9.9286(5)                                                         | 9.9527(14)                                                        | 10.017(2)                                                         |
| α/°                                         | 90                                                                | 90                                                                | 90                                                                | 90                                                                |
| β/°                                         | 98.260(7)                                                         | 97.401(5)                                                         | 97.345(13)                                                        | 97.447(18)                                                        |
| γ/°                                         | 90                                                                | 90                                                                | 90                                                                | 90                                                                |
| Volume/Å <sup>3</sup>                       | 1237.90(14)                                                       | 1295.95(12)                                                       | 1309.5(4)                                                         | 1329.4(5)                                                         |
| Z                                           | 2                                                                 | 2                                                                 | 2                                                                 | 2                                                                 |
| ρ <sub>calc</sub> /cm <sup>3</sup>          | 1.653                                                             | 1.577                                                             | 1.563                                                             | 1.540                                                             |
| μ/mm <sup>-1</sup>                          | 3.577                                                             | 3.417                                                             | 3.381                                                             | 3.331                                                             |
| F(000)                                      | 616.0                                                             | 614.0                                                             | 616.0                                                             | 616.0                                                             |
| Crystal size/mm <sup>3</sup>                | 0.23 × 0.04 × 0.02                                                | 0.23 × 0.04 × 0.02                                                | 0.23 × 0.04 × 0.02                                                | 0.23 × 0.04 × 0.02                                                |
| Radiation                                   | MoKα (λ = 0.71073)                                                |
| 2θ range for data collection/°              | 5.66 to 61.012                                                    | 5.764 to 61.01                                                    | 5.748 to 48.98                                                    | 6.342 to 61.276                                                   |
| Index ranges                                | -12 ≤ h ≤ 11, -20 ≤ k ≤ 20, -12 ≤ l ≤ 13                          | -12 ≤ h ≤ 12, -20 ≤ k ≤ 20, -14 ≤ l ≤ 13                          | -9 ≤ h ≤ 10, -13 ≤ k ≤ 14, -10 ≤ l ≤ 11                           | -12 ≤ h ≤ 12, -19 ≤ k ≤ 21, -12 ≤ l ≤ 14                          |
| Reflections collected                       | 11793                                                             | 21626                                                             | 5812                                                              | 10855                                                             |
| Independent reflections                     | 6661 [R <sub>int</sub> = 0.0769, R <sub>sigma</sub> = 0.1748]     | 7211 [R <sub>int</sub> = 0.1224, R <sub>sigma</sub> = 0.2146]     | 2778 [R <sub>int</sub> = 0.1119, R <sub>sigma</sub> = 0.2066]     | 6842 [R <sub>int</sub> = 0.1739, R <sub>sigma</sub> = 0.5612]     |
| Data/restraints/parameters                  | 6661/1/299                                                        | 7211/9/267                                                        | 2778/1/299                                                        | 6842/1/259                                                        |
| Goodness-of-fit on F <sup>2</sup>           | 0.988                                                             | 0.943                                                             | 0.934                                                             | 0.866                                                             |
| Final R indexes [I >= 2σ (I)]               | R <sub>1</sub> = 0.0742, wR <sub>2</sub> = 0.0913                 | R <sub>1</sub> = 0.0725, wR <sub>2</sub> = 0.0870                 | R <sub>1</sub> = 0.0652, wR <sub>2</sub> = 0.0953                 | R <sub>1</sub> = 0.0898, wR <sub>2</sub> = 0.1608                 |
| Final R indexes [all data]                  | R <sub>1</sub> = 0.1580, wR <sub>2</sub> = 0.1194                 | R <sub>1</sub> = 0.2576, wR <sub>2</sub> = 0.1323                 | R <sub>1</sub> = 0.1890, wR <sub>2</sub> = 0.1447                 | R <sub>1</sub> = 0.4421, wR <sub>2</sub> = 0.3073                 |
| Largest diff. peak/hole / e Å <sup>-3</sup> | 0.88/-0.61                                                        | 0.52/-0.37                                                        | 0.30/-0.28                                                        | 0.42/-0.35                                                        |
| Flack parameter                             | 0.004(15)                                                         | -0.009(15)                                                        | -0.01(3)                                                          | 0.00(4)                                                           |

**Table S3 Crystal data and structure refinement for refinement for [Fe(RR-S-L<sub>2</sub>)(NCS)<sub>2</sub>].**

| Empirical formula                           | C <sub>23</sub> H <sub>26</sub> FeN <sub>6</sub> OS <sub>2</sub> | C <sub>23</sub> H <sub>25</sub> FeN <sub>6</sub> OS <sub>2</sub> | C <sub>23</sub> H <sub>26</sub> FeN <sub>6</sub> OS <sub>2</sub> | C <sub>23</sub> H <sub>26</sub> FeN <sub>6</sub> OS <sub>2</sub> | C <sub>23</sub> H <sub>26</sub> FeN <sub>6</sub> OS <sub>2</sub> |
|---------------------------------------------|------------------------------------------------------------------|------------------------------------------------------------------|------------------------------------------------------------------|------------------------------------------------------------------|------------------------------------------------------------------|
| Formula weight                              | 522.47                                                           | 521.46                                                           | 522.47                                                           | 522.47                                                           | 522.47                                                           |
| Temperature/K                               | 92.05(10)                                                        | 149.8(4)                                                         | 199.90(14)                                                       | 249.90(14)                                                       | 299.95(10)                                                       |
| Crystal system                              | monoclinic                                                       | monoclinic                                                       | monoclinic                                                       | monoclinic                                                       | monoclinic                                                       |
| Space group                                 | P2 <sub>1</sub>                                                  |
| a/Å                                         | 8.8449(5)                                                        | 8.9161(4)                                                        | 8.9560(5)                                                        | 8.9762(8)                                                        | 8.9966(4)                                                        |
| b/Å                                         | 14.4593(7)                                                       | 14.5306(6)                                                       | 14.5794(8)                                                       | 14.6245(11)                                                      | 14.6464(6)                                                       |
| c/Å                                         | 9.6066(4)                                                        | 9.6438(4)                                                        | 9.6812(4)                                                        | 9.7166(6)                                                        | 9.7359(3)                                                        |
| α/°                                         | 90                                                               | 90                                                               | 90                                                               | 90                                                               | 90                                                               |
| β/°                                         | 96.395(4)                                                        | 96.383(4)                                                        | 96.444(5)                                                        | 96.509(7)                                                        | 96.448(3)                                                        |
| γ/°                                         | 90                                                               | 90                                                               | 90                                                               | 90                                                               | 90                                                               |
| Volume/Å <sup>3</sup>                       | 1220.95(10)                                                      | 1241.67(9)                                                       | 1256.12(11)                                                      | 1267.30(17)                                                      | 1274.76(9)                                                       |
| Z                                           | 2                                                                | 2                                                                | 2                                                                | 2                                                                | 2                                                                |
| ρ <sub>calc</sub> /cm <sup>3</sup>          | 1.421                                                            | 1.395                                                            | 1.381                                                            | 1.369                                                            | 1.361                                                            |
| μ/mm <sup>-1</sup>                          | 0.817                                                            | 0.803                                                            | 0.794                                                            | 0.787                                                            | 0.782                                                            |
| F(000)                                      | 544.0                                                            | 542.0                                                            | 544.0                                                            | 544.0                                                            | 544.0                                                            |
| Crystal size/mm <sup>3</sup>                | 0.79 × 0.21 × 0.08                                               | 0.79 × 0.21 × 0.08                                               | 0.79 × 0.21 × 0.08                                               | 0.79 × 0.21 × 0.08                                               | 0.79 × 0.21 × 0.08                                               |
| Radiation                                   | MoKα (λ = 0.71073)                                               |
| 2θ range for data collection/°              | 5.634 to 59.808                                                  | 5.904 to 59.664                                                  | 5.876 to 59.59                                                   | 5.858 to 59.718                                                  | 5.848 to 59.71                                                   |
| Index ranges                                | -12 ≤ h ≤ 11, -20 ≤ k ≤ 20, -13 ≤ l ≤ 12                         | -11 ≤ h ≤ 12, -20 ≤ k ≤ 20, -12 ≤ l ≤ 13                         | -12 ≤ h ≤ 11, -20 ≤ k ≤ 20, -13 ≤ l ≤ 13                         | -11 ≤ h ≤ 12, -20 ≤ k ≤ 20, -13 ≤ l ≤ 13                         | -12 ≤ h ≤ 11, -20 ≤ k ≤ 20, -13 ≤ l ≤ 13                         |
| Reflections collected                       | 11925                                                            | 12097                                                            | 12244                                                            | 12380                                                            | 12358                                                            |
| Independent reflections                     | 6170 [R <sub>int</sub> = 0.0330, R <sub>sigma</sub> = 0.0661]    | 6271 [R <sub>int</sub> = 0.0344, R <sub>sigma</sub> = 0.0690]    | 6340 [R <sub>int</sub> = 0.0332, R <sub>sigma</sub> = 0.0711]    | 6386 [R <sub>int</sub> = 0.0372, R <sub>sigma</sub> = 0.0798]    | 6456 [R <sub>int</sub> = 0.0393, R <sub>sigma</sub> = 0.0868]    |
| Data/restraints/parameters                  | 6170/5/352                                                       | 6271/6/322                                                       | 6340/1/362                                                       | 6386/7/341                                                       | 6456/7/362                                                       |
| Goodness-of-fit on F <sup>2</sup>           | 1.023                                                            | 1.034                                                            | 1.023                                                            | 1.005                                                            | 1.012                                                            |
| Final R indexes [I > 2σ (I)]                | R <sub>1</sub> = 0.0487, wR <sub>2</sub> = 0.0912                | R <sub>1</sub> = 0.0538, wR <sub>2</sub> = 0.1025                | R <sub>1</sub> = 0.0500, wR <sub>2</sub> = 0.0844                | R <sub>1</sub> = 0.0538, wR <sub>2</sub> = 0.0887                | R <sub>1</sub> = 0.0545, wR <sub>2</sub> = 0.0815                |
| Final R indexes [all data]                  | R <sub>1</sub> = 0.0694, wR <sub>2</sub> = 0.1034                | R <sub>1</sub> = 0.0839, wR <sub>2</sub> = 0.1206                | R <sub>1</sub> = 0.0929, wR <sub>2</sub> = 0.1030                | R <sub>1</sub> = 0.1109, wR <sub>2</sub> = 0.1133                | R <sub>1</sub> = 0.1319, wR <sub>2</sub> = 0.1110                |
| Largest diff. peak/hole / e Å <sup>-3</sup> | 0.47/-0.29                                                       | 0.49/-0.33                                                       | 0.43/-0.31                                                       | 0.38/-0.28                                                       | 0.30/-0.24                                                       |
| Flack parameter                             | 0.002(11)                                                        | -0.002(13)                                                       | 0.005(12)                                                        | 0.020(13)                                                        | -0.016(14)                                                       |

**Table S4 Crystal data and structure refinement for refinement for [Fe(SS-R-L<sub>2</sub>)(NCS)<sub>2</sub>].**

|                                             |                                                                  |                                                                   |                                                                  |                                                                  |
|---------------------------------------------|------------------------------------------------------------------|-------------------------------------------------------------------|------------------------------------------------------------------|------------------------------------------------------------------|
| Empirical formula                           | C <sub>23</sub> H <sub>26</sub> FeN <sub>6</sub> OS <sub>2</sub> | C <sub>23</sub> FeN <sub>6</sub> OS <sub>2</sub> H <sub>0.5</sub> | C <sub>23</sub> H <sub>26</sub> FeN <sub>6</sub> OS <sub>2</sub> | C <sub>23</sub> H <sub>26</sub> FeN <sub>6</sub> OS <sub>2</sub> |
| Formula weight                              | 522.47                                                           | 496.76                                                            | 522.47                                                           | 522.47                                                           |
| Temperature/K                               | 92(3)                                                            | 132(4)                                                            | 202(3)                                                           | 401(1)                                                           |
| Crystal system                              | monoclinic                                                       | monoclinic                                                        | monoclinic                                                       | monoclinic                                                       |
| Space group                                 | P2 <sub>1</sub>                                                  | P2 <sub>1</sub>                                                   | P2 <sub>1</sub>                                                  | P2 <sub>1</sub>                                                  |
| a/Å                                         | 8.8517(3)                                                        | 8.9004(4)                                                         | 8.9656(5)                                                        | 9.0250(4)                                                        |
| b/Å                                         | 14.4554(5)                                                       | 14.5127(8)                                                        | 14.5928(9)                                                       | 14.7281(8)                                                       |
| c/Å                                         | 9.5844(3)                                                        | 9.6200(4)                                                         | 9.6785(5)                                                        | 9.7940(4)                                                        |
| α/°                                         | 90                                                               | 90                                                                | 90                                                               | 90                                                               |
| β/°                                         | 96.324(3)                                                        | 96.242(4)                                                         | 96.291(5)                                                        | 96.401(4)                                                        |
| γ/°                                         | 90                                                               | 90                                                                | 90                                                               | 90                                                               |
| Volume/Å <sup>3</sup>                       | 1218.91(7)                                                       | 1235.24(10)                                                       | 1258.64(12)                                                      | 1293.71(11)                                                      |
| Z                                           | 2                                                                | 2                                                                 | 2                                                                | 2                                                                |
| ρ <sub>calc</sub> /cm <sup>3</sup>          | 1.424                                                            | 1.336                                                             | 1.379                                                            | 1.341                                                            |
| μ/mm <sup>-1</sup>                          | 0.818                                                            | 0.805                                                             | 0.792                                                            | 0.771                                                            |
| F(000)                                      | 544.0                                                            | 493.0                                                             | 544.0                                                            | 544.0                                                            |
| Crystal size/mm <sup>3</sup>                | 0.23 × 0.06 × 0.04                                               | 0.23 × 0.06 × 0.04                                                | 0.23 × 0.06 × 0.04                                               | 0.23 × 0.06 × 0.04                                               |
| Radiation                                   | MoKα (λ = 0.71073)                                               | MoKα (λ = 0.71073)                                                | MoKα (λ = 0.71073)                                               | MoKα (λ = 0.71073)                                               |
| 2θ range for data collection/°              | 5.948 to 55.468                                                  | 5.614 to 59.728                                                   | 5.584 to 59.53                                                   | 5.532 to 59.79                                                   |
| Index ranges                                | -10 ≤ h ≤ 10, -18 ≤ k ≤ 18, -10 ≤ l ≤ 12                         | -7 ≤ h ≤ 12, -20 ≤ k ≤ 19, -13 ≤ l ≤ 11                           | -12 ≤ h ≤ 7, -20 ≤ k ≤ 19, -11 ≤ l ≤ 13                          | -12 ≤ h ≤ 7, -20 ≤ k ≤ 20, -11 ≤ l ≤ 13                          |
| Reflections collected                       | 8677                                                             | 10926                                                             | 11180                                                            | 11534                                                            |
| Independent reflections                     | 4813 [R <sub>int</sub> = 0.0435, R <sub>sigma</sub> = 0.0999]    | 6147 [R <sub>int</sub> = 0.0441, R <sub>sigma</sub> = 0.1034]     | 6261 [R <sub>int</sub> = 0.0435, R <sub>sigma</sub> = 0.1059]    | 6472 [R <sub>int</sub> = 0.0618, R <sub>sigma</sub> = 0.1371]    |
| Data/restraints/parameters                  | 4813/1/292                                                       | 6147/9/312                                                        | 6261/7/312                                                       | 6472/1/299                                                       |
| Goodness-of-fit on F <sup>2</sup>           | 1.021                                                            | 1.005                                                             | 1.004                                                            | 0.995                                                            |
| Final R indexes [I >= 2σ (I)]               | R <sub>1</sub> = 0.0589, wR <sub>2</sub> = 0.0875                | R <sub>1</sub> = 0.0634, wR <sub>2</sub> = 0.0954                 | R <sub>1</sub> = 0.0635, wR <sub>2</sub> = 0.0910                | R <sub>1</sub> = 0.0617, wR <sub>2</sub> = 0.0864                |
| Final R indexes [all data]                  | R <sub>1</sub> = 0.0936, wR <sub>2</sub> = 0.1030                | R <sub>1</sub> = 0.1173, wR <sub>2</sub> = 0.1167                 | R <sub>1</sub> = 0.1322, wR <sub>2</sub> = 0.1167                | R <sub>1</sub> = 0.2071, wR <sub>2</sub> = 0.1407                |
| Largest diff. peak/hole / e Å <sup>-3</sup> | 0.48/-0.31                                                       | 0.45/-0.30                                                        | 0.48/-0.26                                                       | 0.43/-0.26                                                       |
| Flack parameter                             | -0.001(16)                                                       | 0.000(15)                                                         | 0.022(15)                                                        | 0.01(2)                                                          |



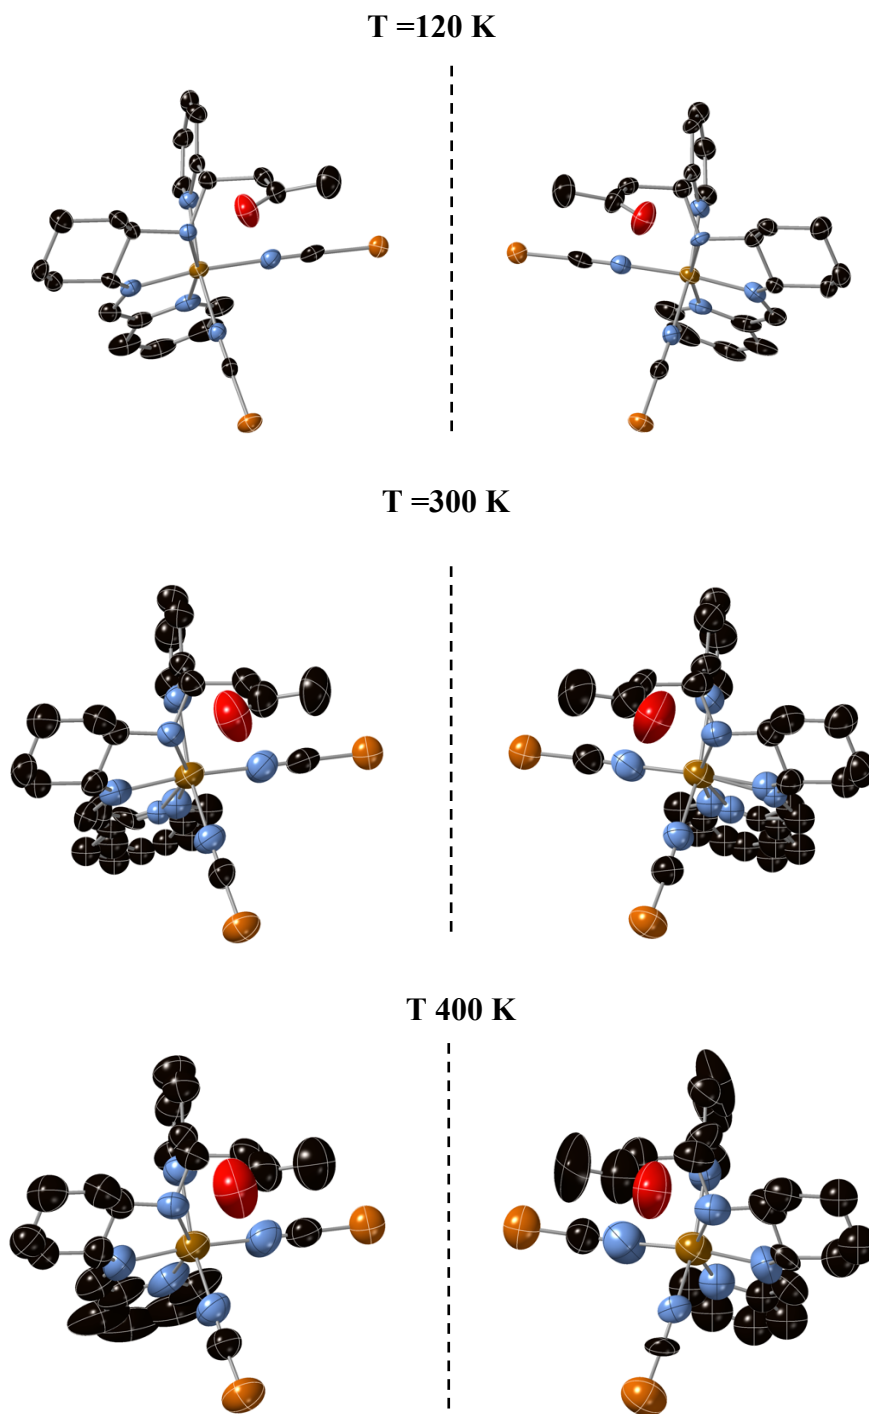

**Fig. S3** Asymmetric unit of  $[\text{Fe}(\text{RR-S-L}_2)(\text{NCSe})_2]$  (left) and  $[\text{Fe}(\text{SS-R-L}_2)(\text{NCSe})_2]$  (right) at 120 K (top), 300 K (medium) and 400 K (bottom). Fe (brown), Se (orange), C (black), N (blue) and O (red). Hydrogen atoms have been omitted for clarity.

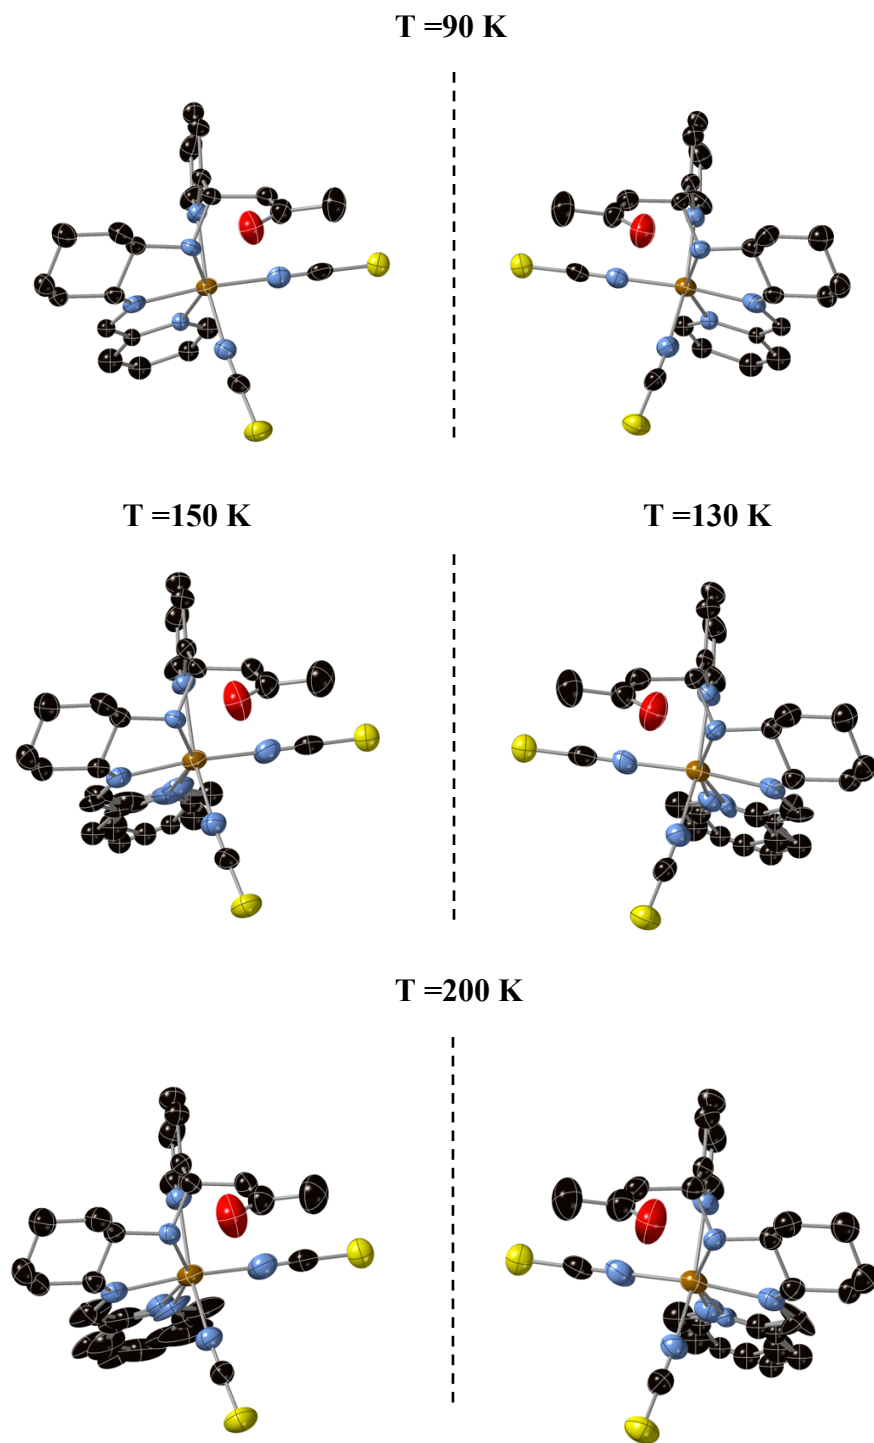

**Fig. S4** Asymmetric unit of  $[\text{Fe}(\text{RR-S-L}_2)(\text{NCSe})_2]$  (left) and  $[\text{Fe}(\text{SS-R-L}_2)(\text{NCSe})_2]$  (right) at 90 K (top), 150 K (*RR-S-*) and 130 K (*SS-R-*) (medium) and 200 K (bottom). Fe (brown), S (yellow), C (black), N (blue) and O (red). Hydrogen atoms have been omitted for clarity.

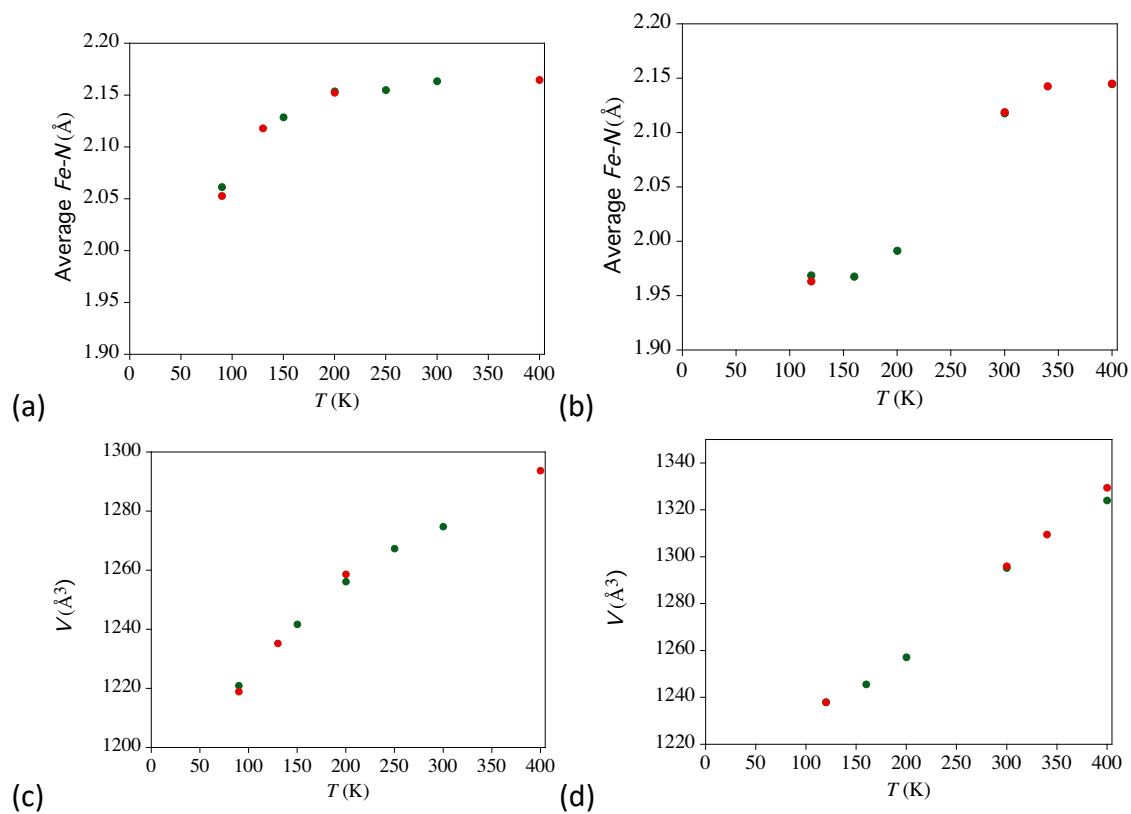

**Fig. S5** Thermal variation of the average Fe-N distances for [Fe(RR-S-L<sub>2</sub>)(NCS)<sub>2</sub>] (green circles) and [Fe(SS-R-L<sub>2</sub>)(NCS)<sub>2</sub>] (red circles) (a) and [Fe(RR-S-L<sub>2</sub>)(NCSe)<sub>2</sub>] (green circles) and [Fe(SS-R-L<sub>2</sub>)(NCSe)<sub>2</sub>] (red circles) (b). Thermal variation of unit cell volumes for [Fe(RR-S-L<sub>2</sub>)(NCS)<sub>2</sub>] (green circles) and [Fe(SS-R-L<sub>2</sub>)(NCS)<sub>2</sub>] (red circles) (c) and [Fe(RR-S-L<sub>2</sub>)(NCSe)<sub>2</sub>] (green circles) and [Fe(SS-R-L<sub>2</sub>)(NCSe)<sub>2</sub>] (red circles) (d).

**Table S5** Bond lengths and distortion parameters of [Fe(*RR-S-* and *SS-R-L<sub>2</sub>*)(NCX)<sub>2</sub>] at variable temperatures. Dashed values correspond to the second configuration of the complexes found in some of the structures.

|          | [Fe( <i>RR-S-L<sub>2</sub></i> )(NCS) <sub>2</sub> ]  | 90 K                                                                                      | 150 K                                                                                                    | 200 K                                                                                     | 250 K                                                                                       | 300 K                                                                                     |
|----------|-------------------------------------------------------|-------------------------------------------------------------------------------------------|----------------------------------------------------------------------------------------------------------|-------------------------------------------------------------------------------------------|---------------------------------------------------------------------------------------------|-------------------------------------------------------------------------------------------|
| Fe-N (Å) |                                                       | 2.098(3)<br>2.011(4)<br>2.149(4)<br>2.016(4)<br><b>2.10(4)</b><br>2.014(5)<br>2.06(4)     | 2.173(4)<br>2.215(4)<br><b>2.280(10)</b><br>2.086(5)<br>2.052(6)<br>2.012(11)<br>2.103(5)                | 2.204(4)<br>2.128(5)<br>2.242(4)<br><b>2.322(11)</b><br>2.096(5)<br>2.067(6)<br>2.046(10) | 2.219(4)<br>2.247(4)<br>2.133(6)<br><b>2.335(13)</b><br>2.098(5)<br>2.071(7)<br>2.042(12)   | 2.253(5)<br>2.229(4)<br>2.138(6)<br><b>2.343(14)</b><br>2.097(6)<br>2.063(7)<br>2.058(12) |
| Σ (°)    |                                                       | 80.29<br><b>101.09</b>                                                                    | 93.41<br><b>110.99</b>                                                                                   | 97.61<br><b>115.91</b>                                                                    | 98.74<br><b>116.64</b>                                                                      | 99.77<br><b>117.72</b>                                                                    |
| Θ (°)    |                                                       | 228.91<br><b>283.16</b>                                                                   | 267.61<br><b>317.63</b>                                                                                  | 280.88<br><b>332.88</b>                                                                   | 285.73<br><b>337.04</b>                                                                     | 285.82<br><b>340.46</b>                                                                   |
|          | [Fe( <i>SS-R-L<sub>2</sub></i> )(NCS) <sub>2</sub> ]  | 90 K                                                                                      | 130 K                                                                                                    | 200 K                                                                                     | 400 K                                                                                       |                                                                                           |
| Fe-N (Å) |                                                       | 2.094(5)<br>2.003(6)<br>2.024(6)<br>2.141(5)<br>1.925(13)<br>2.005(7)<br><b>2.173(15)</b> | 2.152(4)<br>2.060(6)<br>2.188(5)<br>2.063(6)<br><b>2.248(13)</b><br>2.038(7)<br>1.979(12)                | 2.210(5)<br>2.238(5)<br>2.127(6)<br><b>2.305(13)</b><br>2.096(6)<br>2.066(7)<br>2.030(13) | 2.232(7)<br>2.191(10)<br>2.266(7)<br>2.142(9)<br>2.098(9)<br>2.059(11)                      |                                                                                           |
| Σ (°)    |                                                       | 79.65<br><b>97.40</b>                                                                     | 87.57<br><b>105.21</b>                                                                                   | 96.81<br><b>114.42</b>                                                                    | 106.65                                                                                      |                                                                                           |
| Θ (°)    |                                                       | 220.44<br><b>275.55</b>                                                                   | 254.58<br><b>307.31</b>                                                                                  | 278.03<br><b>330.06</b>                                                                   | 311.83                                                                                      |                                                                                           |
|          | [Fe( <i>RR-S-L<sub>2</sub></i> )(NCSe) <sub>2</sub> ] | 120 K                                                                                     | 160 K                                                                                                    | 200 K                                                                                     | 300 K                                                                                       | 400 K                                                                                     |
| Fe-N (Å) |                                                       | 2.048(6)<br>1.993(6)<br>1.890(6)<br>1.963(7)<br>1.953(7)<br>1.964(7)                      | 2.058(9)<br>1.993(10)<br>1.942(12)<br>1.880(10)<br>1.971(12)<br>1.961(13)                                | 2.026(6)<br>2.082(6)<br>1.917(7)<br>1.976(7)<br>1.968(7)<br>1.978(8)                      | 2.173(7)<br>2.214(7)<br>2.065(9)<br>1.946(19)<br>2.074(10)<br>2.052(11)<br><b>2.323(19)</b> | 2.237(10)<br>2.086(12)<br>2.213(12)<br>2.167(17)<br>2.053(15)<br>2.112(14)                |
| Σ (°)    |                                                       | 71.28                                                                                     | 69.90                                                                                                    | 76.07                                                                                     | 90.83<br><b>109.07</b>                                                                      | 102.98                                                                                    |
| Θ (°)    |                                                       | 186.46                                                                                    | 186.68                                                                                                   | 204.01                                                                                    | 261.42<br><b>313.09</b>                                                                     | 301.59                                                                                    |
|          | [Fe( <i>SS-R-L<sub>2</sub></i> )(NCSe) <sub>2</sub> ] | 120 K                                                                                     | 300 K                                                                                                    | 340 K                                                                                     | 400 K                                                                                       |                                                                                           |
| Fe-N (Å) |                                                       | 2.047(9)<br>1.982(8)<br>1.960(10)<br>1.884(10)<br>1.955(11)<br>1.951(9)                   | 2.205(9)<br>2.169(9)<br>1.87(3)<br>1.97(3)<br>2.095(11)<br>2.047(15)<br><b>2.31(4)</b><br><b>2.22(3)</b> | 2.240(18)<br>2.17(2)<br>2.09(3)<br>2.16(3)<br>2.11(2)<br>2.08(3)                          | 2.10(3)<br>2.21(3)<br>2.21(3)<br>2.20(3)<br>2.09(3)<br>2.05(4)                              |                                                                                           |
| Σ (°)    |                                                       | 70.50                                                                                     | 91.54<br><b>110.93</b>                                                                                   | 103.72                                                                                    | 99.10                                                                                       |                                                                                           |
| Θ (°)    |                                                       | 185.01                                                                                    | 274.56<br><b>304.14</b>                                                                                  | 298.33                                                                                    | 313.97                                                                                      |                                                                                           |

$$\Theta = \sum |\theta_i - 60|; \Sigma = \sum |\phi_i - 90|$$

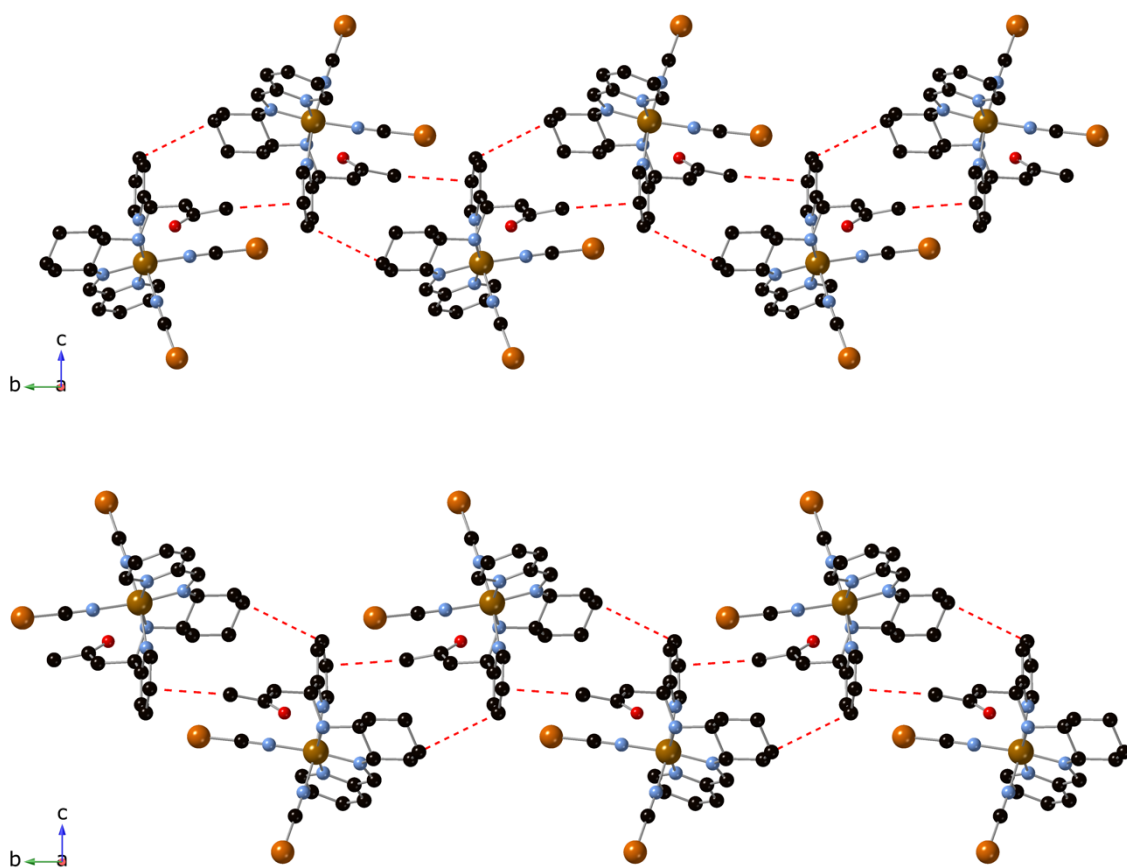

**Fig. S6** Chains of complexes in the structure of  $[\text{Fe}(\text{RR-S-L}_2)(\text{NCSe})_2]$  (top) and  $[\text{Fe}(\text{SS-R-L}_2)(\text{NCSe})_2]$  (bottom) at 120 K linked through intermolecular interactions (red dashed lines).

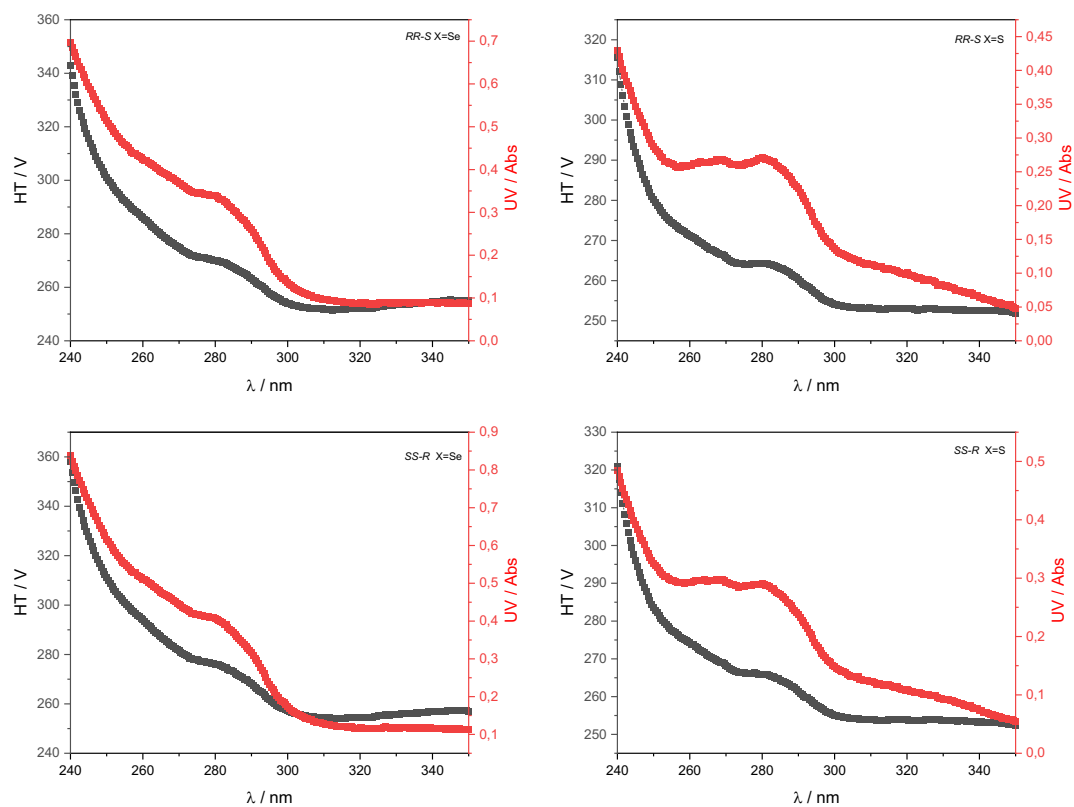

**Fig. S7** UV-vis spectra and High Tension (HT) Voltage of CD measurements for 1 mM  $\text{CHCl}_3$  solutions of  $[\text{Fe}(\text{RR-S-L}_2)(\text{NCSe})_2]$  and  $[\text{Fe}(\text{SS-R-L}_2)(\text{NCSe})_2]$  (left) and  $[\text{Fe}(\text{RR-S-L}_2)(\text{NCS})_2]$  and  $[\text{Fe}(\text{SS-R-L}_2)(\text{NCS})_2]$  (right).

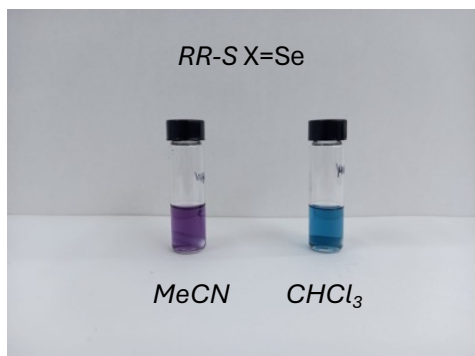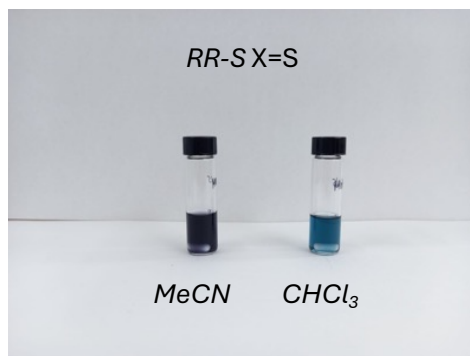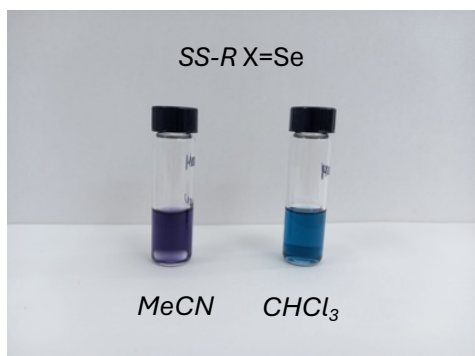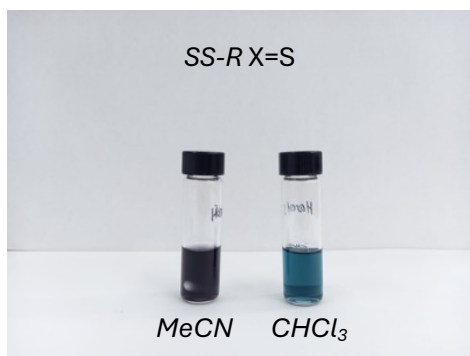

**Fig. S8** Images of  $\text{CHCl}_3$  and MeCN solutions of  $[\text{Fe}(\text{RR-S- or SS-R-L}_2)(\text{NCX})_2]$ .

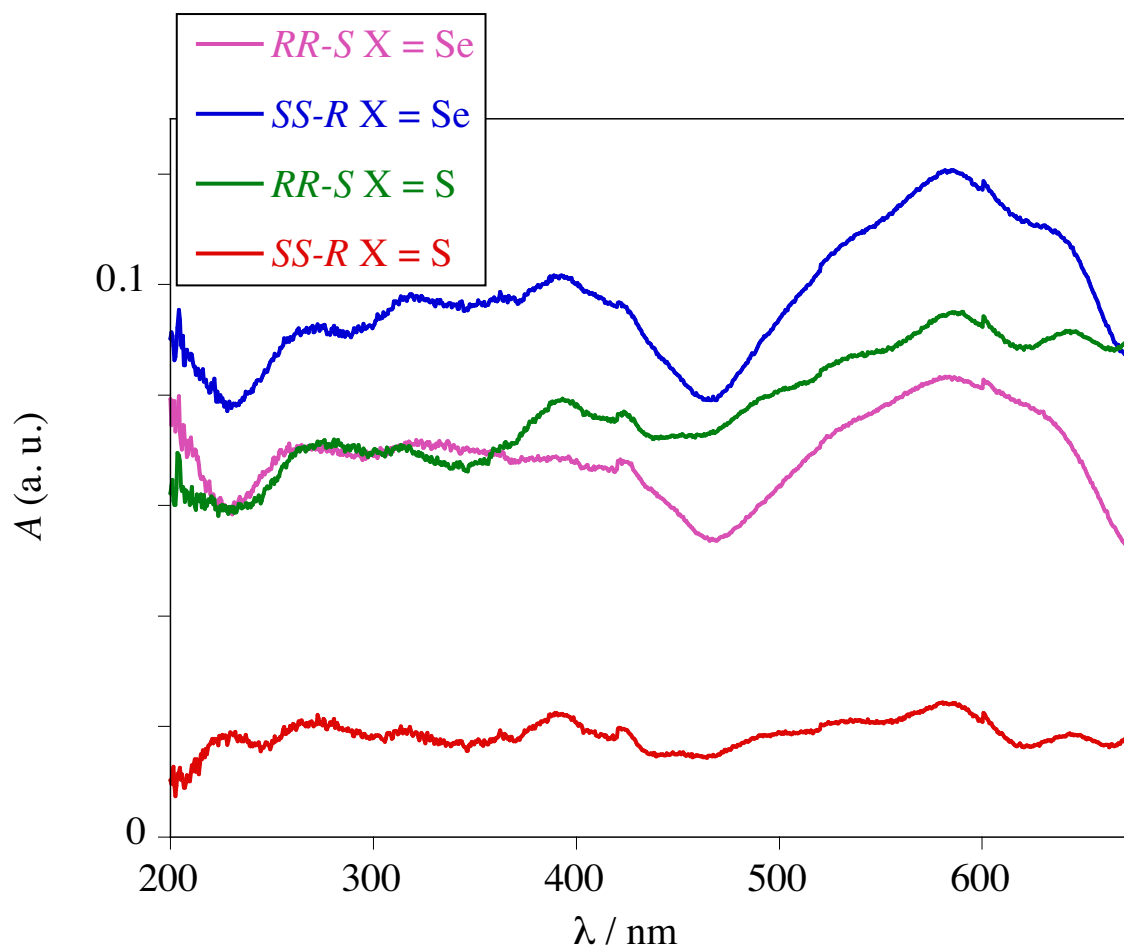

**Fig. S9** Absorbance spectra of  $[\text{Fe}(\text{RR-S- or SS-R-L}_2)(\text{NCX})_2]$  in the solid state.



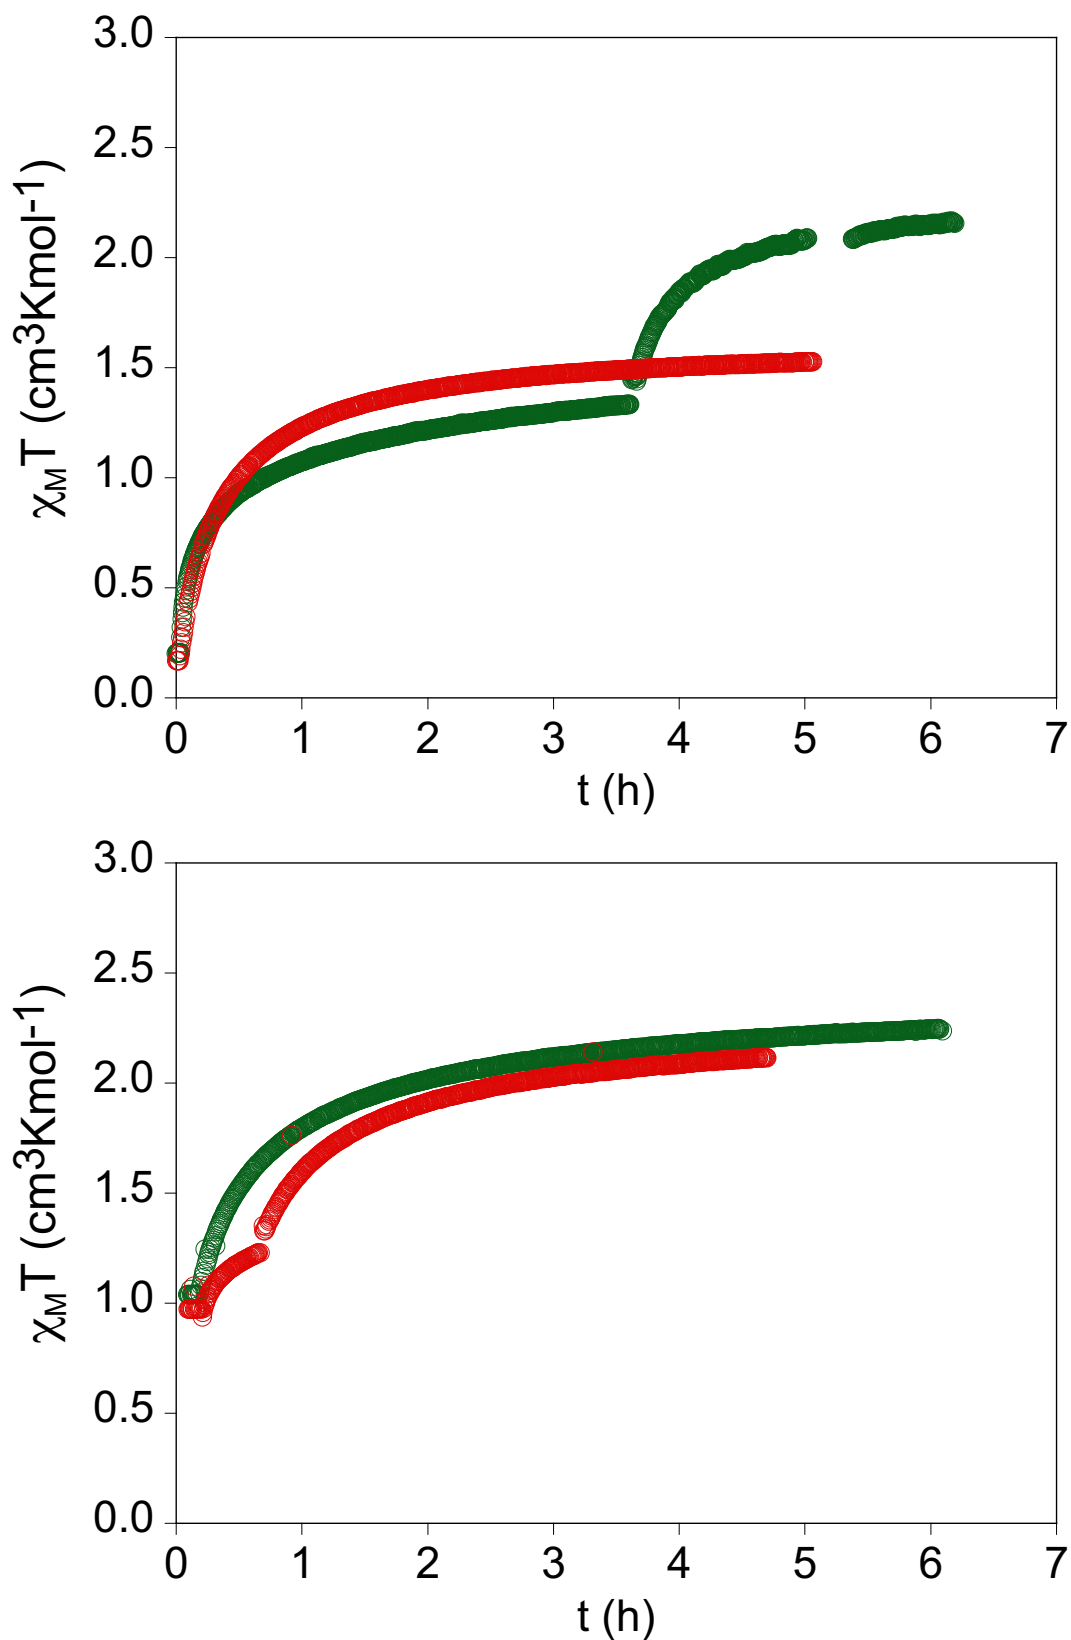

**Fig. S10** Time variation of  $\chi_M T$  for [Fe(RR-S-L<sub>2</sub>)(NCSe)<sub>2</sub>] (green circles) and [Fe(SS-R-L<sub>2</sub>)(NCSe)<sub>2</sub>] (red circles) (**top**), [Fe(RR-S-L<sub>2</sub>)(NCS)<sub>2</sub>] (green circles) and [Fe(SS-R-L<sub>2</sub>)(NCS)<sub>2</sub>] (red circles) (**bottom**) after irradiation at 10 K with 808 nm in the LIESST experiments from **Fig. 5**. [Fe(RR-S-L<sub>2</sub>)(NCSe)<sub>2</sub>] and [Fe(SS-R-L<sub>2</sub>)(NCS)<sub>2</sub>] were first irradiated with 660 nm (3.4 h for [Fe(RR-S-L<sub>2</sub>)(NCSe)<sub>2</sub>] and 0.5 h for [Fe(SS-R-L<sub>2</sub>)(NCS)<sub>2</sub>]).
